# Supplementary material
Source: publisher figshare collection journal article supplement (https://acs.figshare.com/ndownloader/files/13507154)
Supplement: Supplementary file 1 [file 13507154]

# Supporting Information for

## Long-term Effect of Different Fertilization and Cropping Systems on the Soil Antibiotic Resistome

Fang Wang<sup>†,‡,§,◇,\*</sup>, Min Xu<sup>†,◇</sup>, Robert D. Stedtfeld<sup>‡</sup>, Hongjie Sheng<sup>†,‡,§,◇</sup>, Jianbo Fan<sup>†</sup>, Ming Liu<sup>†</sup>,  
Benli Chai<sup>‡,§</sup>, Teotonio Soares de Carvalho<sup>‡,§,||</sup>, Hui Li<sup>‡</sup>, Zhongpei Li<sup>†</sup>, Syed A. Hashsham<sup>‡,§,‡</sup>, and  
James M. Tiedje<sup>†,‡,§,\*</sup>

<sup>†</sup> Key Laboratory of Soil Environment and Pollution Remediation, Institute of Soil Science, Chinese  
Academy of Sciences, Nanjing 210008, PR China

<sup>‡</sup> Department of Plant, Soil and Microbial Sciences, <sup>§</sup> Center for Microbial Ecology, <sup>‡</sup> Department of  
Civil and Environmental Engineering, Michigan State University, MI 48824, USA

<sup>◇</sup> University of Chinese Academy of Sciences, Beijing 100049, China

<sup>||</sup> Soil Science Department, Federal University of Lavras, Lavras 372000, Brazil

\*Corresponding authors. Fang Wang, wangfang@issas.ac.cn; James M. Tiedje, [tiedje@msu.edu](mailto:tiedje@msu.edu).

14 pages, 8 figures, and 2 tables

## Content

**Figure S1** Heatmap showing absolute gene copy number of antibiotic resistance genes and mobile genetic elements in the composted manure and soil with different fertilizer and different cropping system. The resistance genes detected in composted manure or water, but not in the soil were not shown.

**Figure S2** Number of antibiotic resistance genes shared in the dryland soil with different fertilization (a), paddy field soil with different fertilization (b), irrigation water and unfertilized soil (c) and composted manure and composted manure applied soil (d).

**Figure S3** The relationship between log-transformed (base 10) gene copy numbers of ARGs and 16S or MGEs in soil.

**Figure S4** Log-transformed fold change of gene copy numbers of antibiotic resistance genes in the soil with different fertilizer (a) and different cropping system (b).

**Figure S5** Redundancy Analysis (RDA) of log<sub>2</sub> transformed relative abundance of antibiotic resistance genes in the soil (a) and bacteria at genus level (b).

**Figure S6** Co-occurrence network of relative abundance of antibiotic resistance genes (ARGs), mobile genetic elements (MGEs) and bacteria at genus level in the dryland soil (a) and paddy soil (b).

**Figure S7** Fold of change of ARGs and MGEs from different fertilization and cropping system. Fold of change is log<sub>2</sub> transformed. Only genes at least 5-log<sub>2</sub> fold increase or decrease are shown.

**Figure S8** Gene copy numbers and relative abundance of some special antibiotic resistance genes in soil, composted manure and irrigation water.

**Table S1** Physicochemical property of soil and diversity of antibiotic resistance genes in the soils.

**Table S2** Mantel test on the relationship (r) between the relative abundance of the

- 45 antibiotic resistance genes (ARGs) and mobile genetic elements (MGEs) and main soil
- 46 factors influencing the distribution of ARGs in soil.

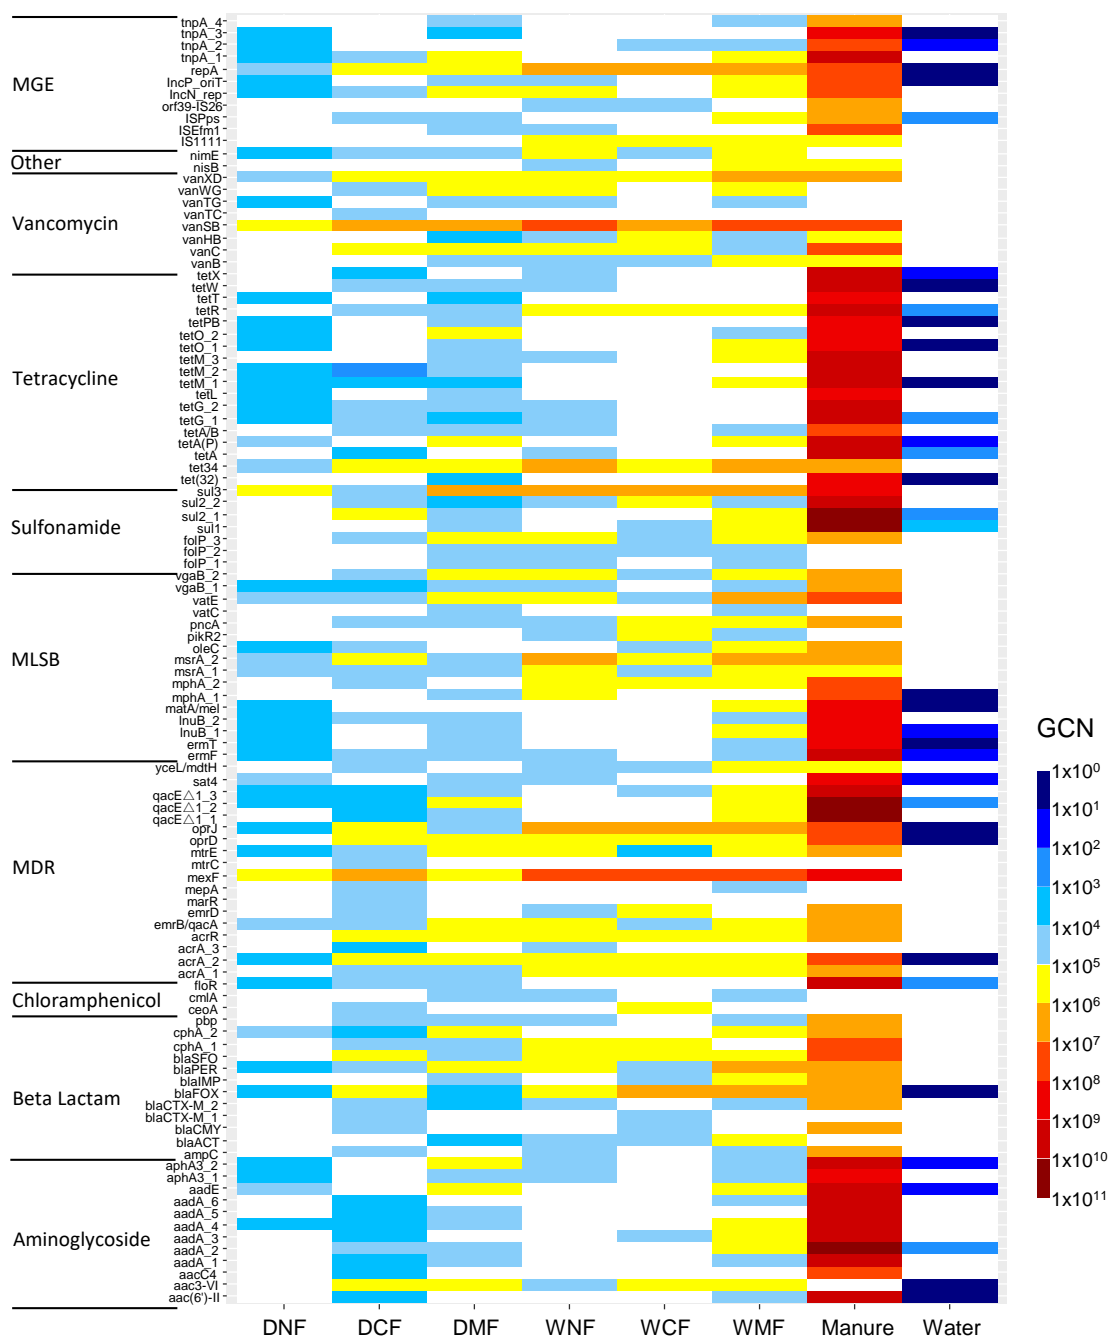

**Figure S1** Heatmap showing absolute gene copy number of antibiotic resistance genes and mobile genetic elements in the manure and soil with different fertilizer and different cropping system. The resistance genes detected in composted manure or water, but not in the soil were not shown. DNF, dryland soil with no fertilizer; DCF, dryland soil with chemical fertilizer; DMF, dryland soil with composted manure; WNF, paddy soil with no fertilizer; WCF, paddy soil with chemical fertilizer; WMF, paddy soil with composted manure.

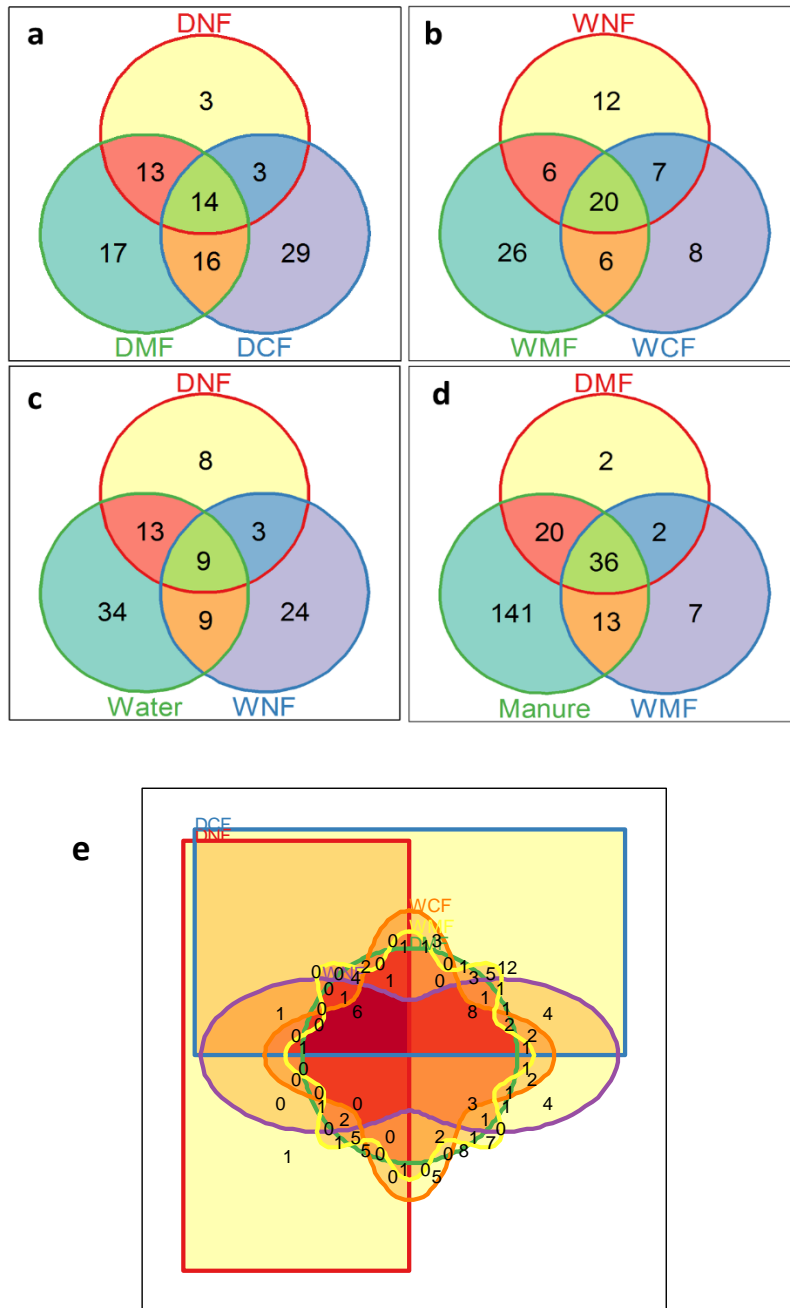

**Figure S2** Number of antibiotic resistance genes and mobile elements genes shared in the dryland soil with different fertilization (a), paddy field soil with different fertilization (b), irrigation water and unfertilized soil (c), composted manure and composted manure applied soil (d) and all the soil (e). DNF, dryland soil with no fertilizer; DCF, dryland soil with chemical fertilizer; DMF, dryland soil with composted manure; WNF, paddy soil with no fertilizer; WCF, paddy soil with chemical fertilizer; WMF, paddy soil with composted manure.

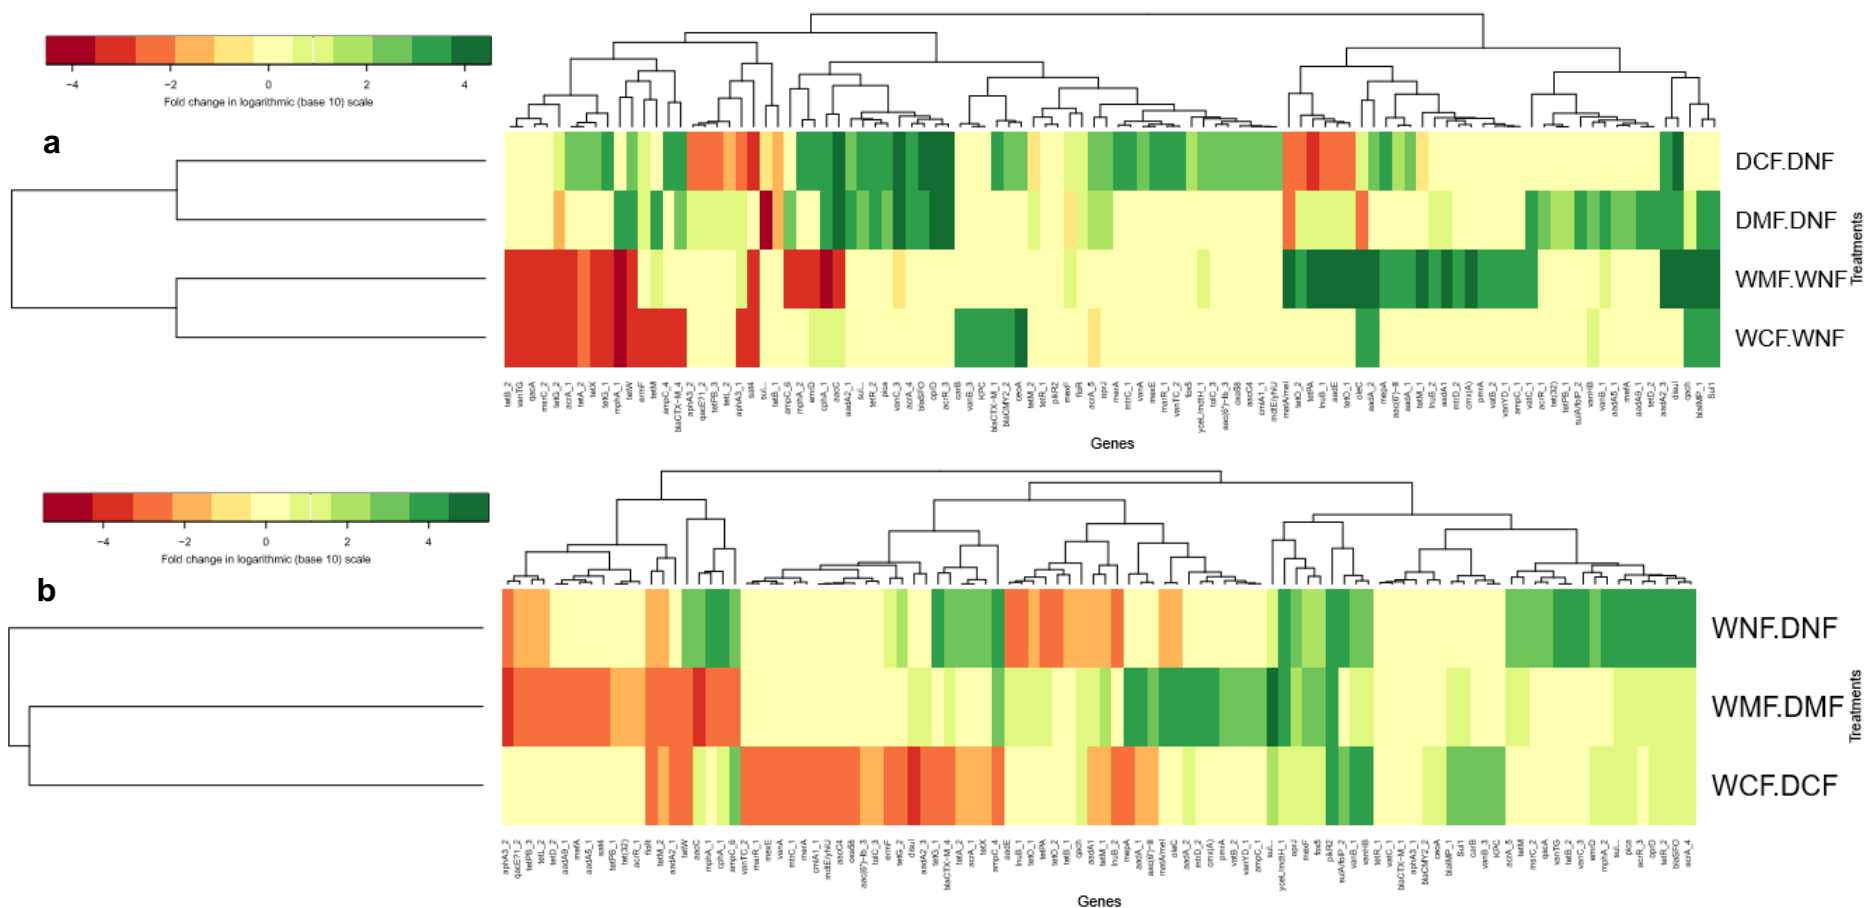

**Figure S3** Log-transformed fold change of gene copy numbers of antibiotic resistance genes in the soil with different fertilizer (a) and different cropping system (b). DNF, dryland soil with no fertilizer; DCF, dryland soil with chemical fertilizer; DMF, dryland soil with composted manure; WNF, paddy soil with no fertilizer; WCF, paddy soil with chemical fertilizer; WMF, paddy soil with composted manure.

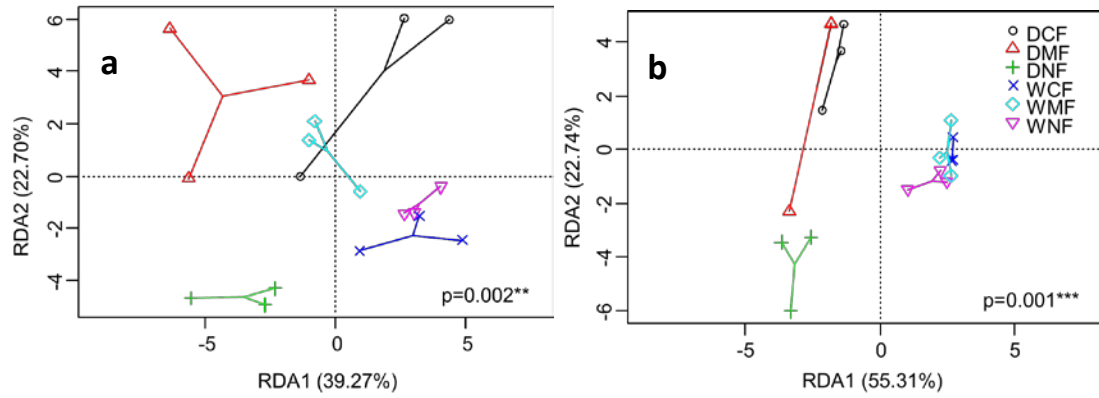

**Figure S4** Redundancy Analysis (RDA) of log<sub>2</sub> transformed relative abundance of antibiotic resistance genes in the soil (a) and bacteria at genus level (b). P values indicate that ordination is significant between different treatments: DNF, dryland soil with no fertilizer; DCF, dryland soil with chemical fertilizer; DMF, dryland soil with composted manure; WNF, paddy soil with no fertilizer; WCF, paddy soil with chemical fertilizer; WMF, paddy soil with composted manure.

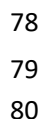

81

82

83

84

85

86



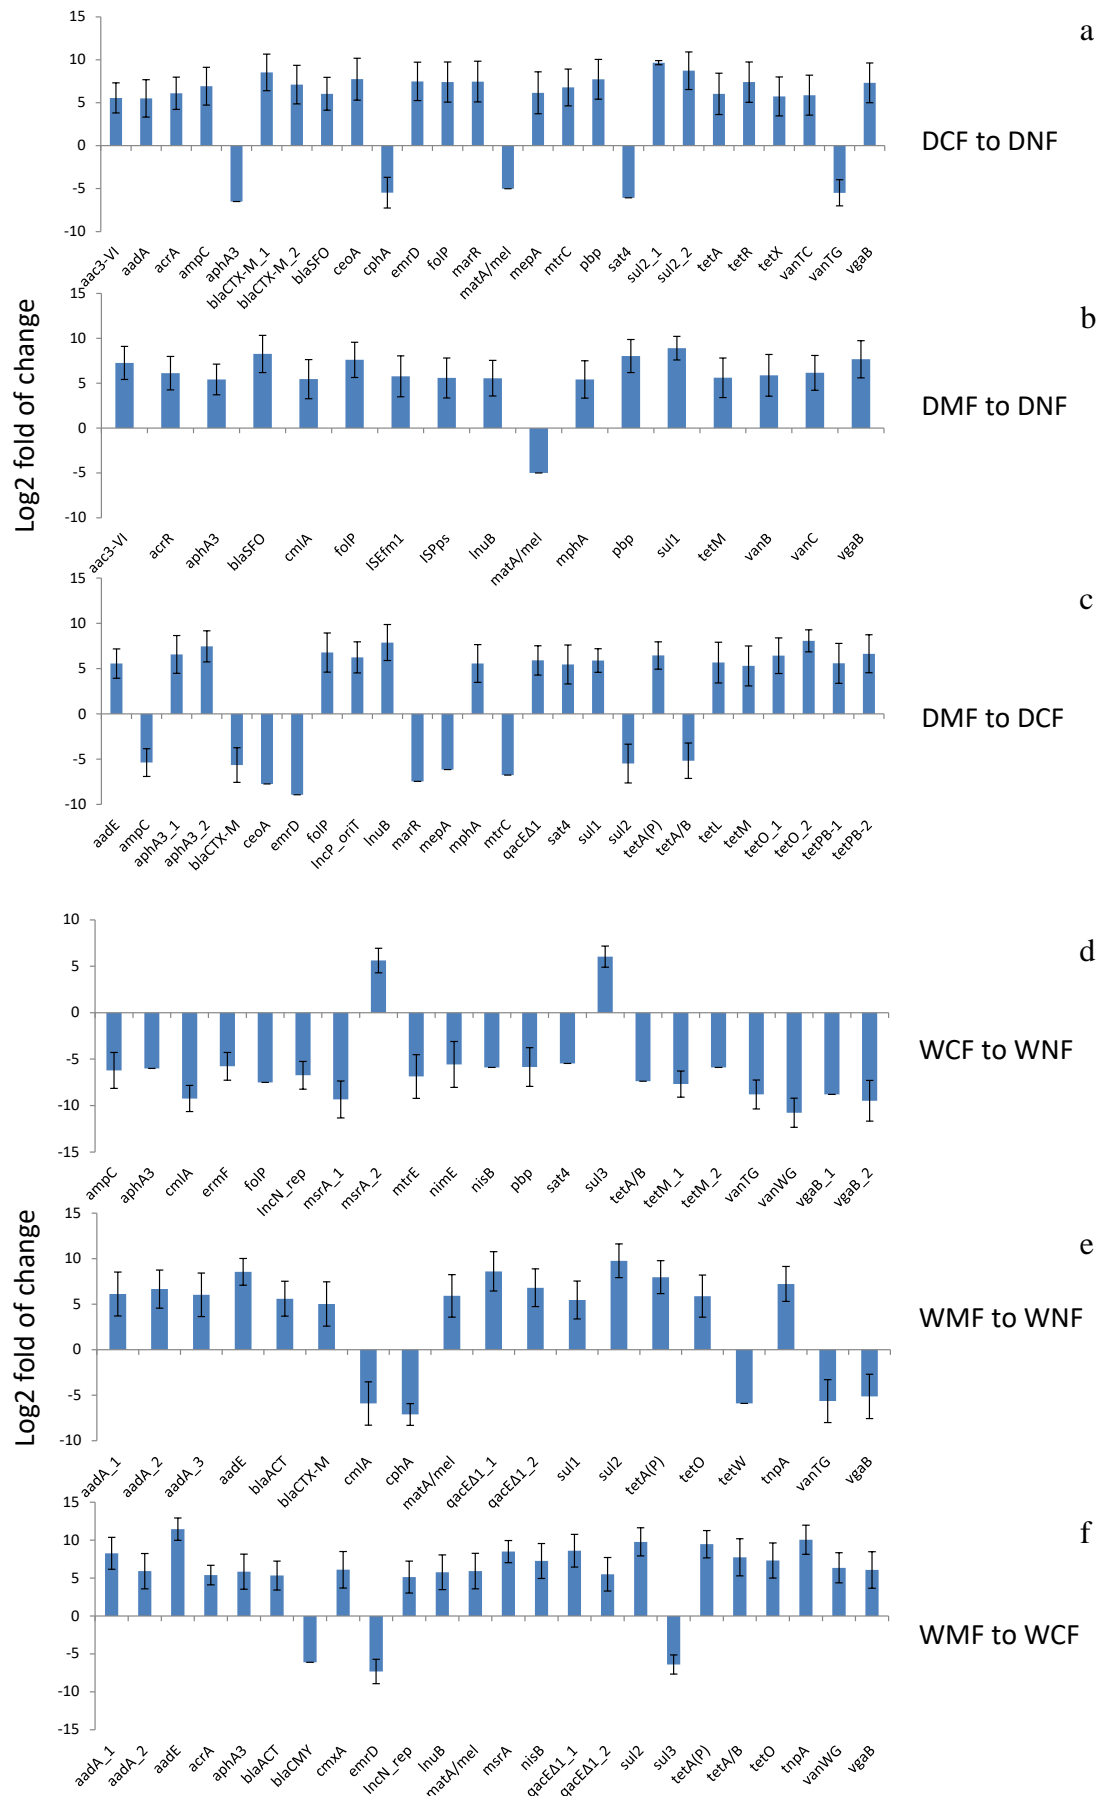

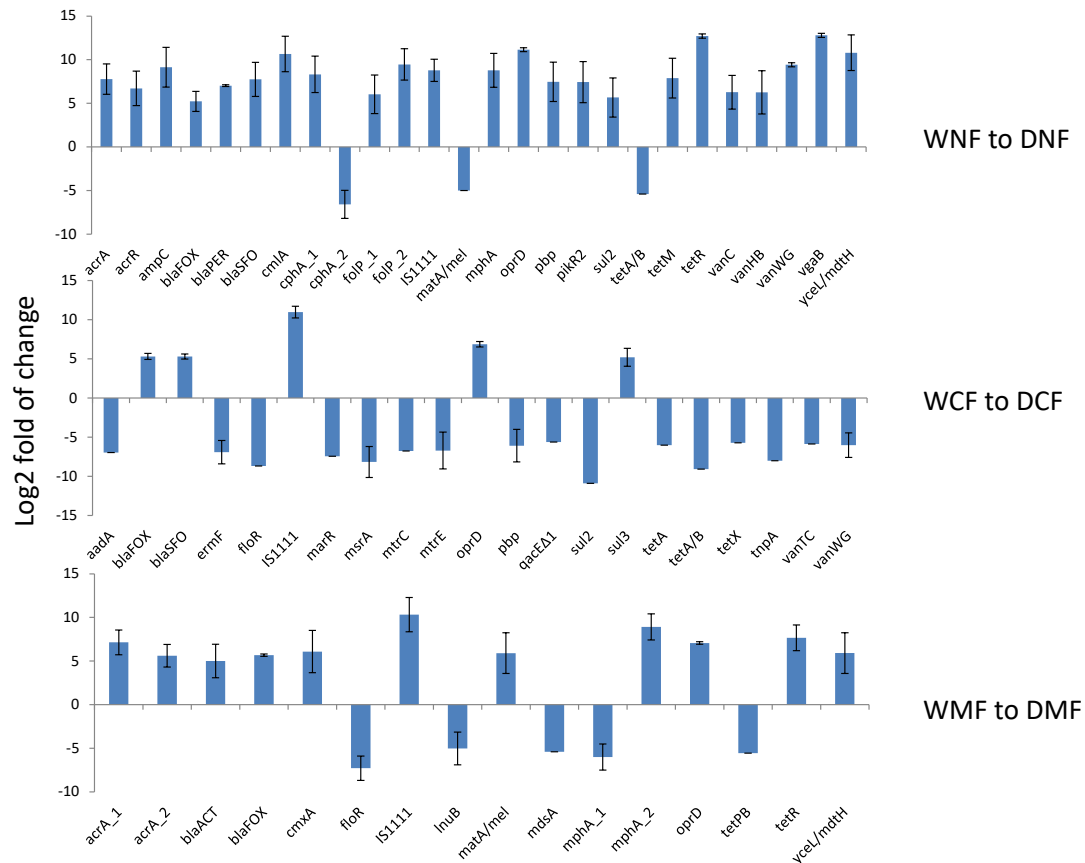

89

90 Figure S6 Fold of change of antibiotic resistance genes (ARGs), mobile genetic  
 91 elements (MGEs) from different fertilization and cropping system. Fold of change is  
 92 log2 transformed. Only genes at least 5-log2fold increase or decrease are shown. DNF,  
 93 dryland soil with no fertilizer; DCF, dryland soil with chemical fertilizer; DMF, dryland  
 94 soil with composted manure; WNF, paddy soil with no fertilizer; WCF, paddy soil with  
 95 chemical fertilizer; WMF, paddy soil with composted manure.

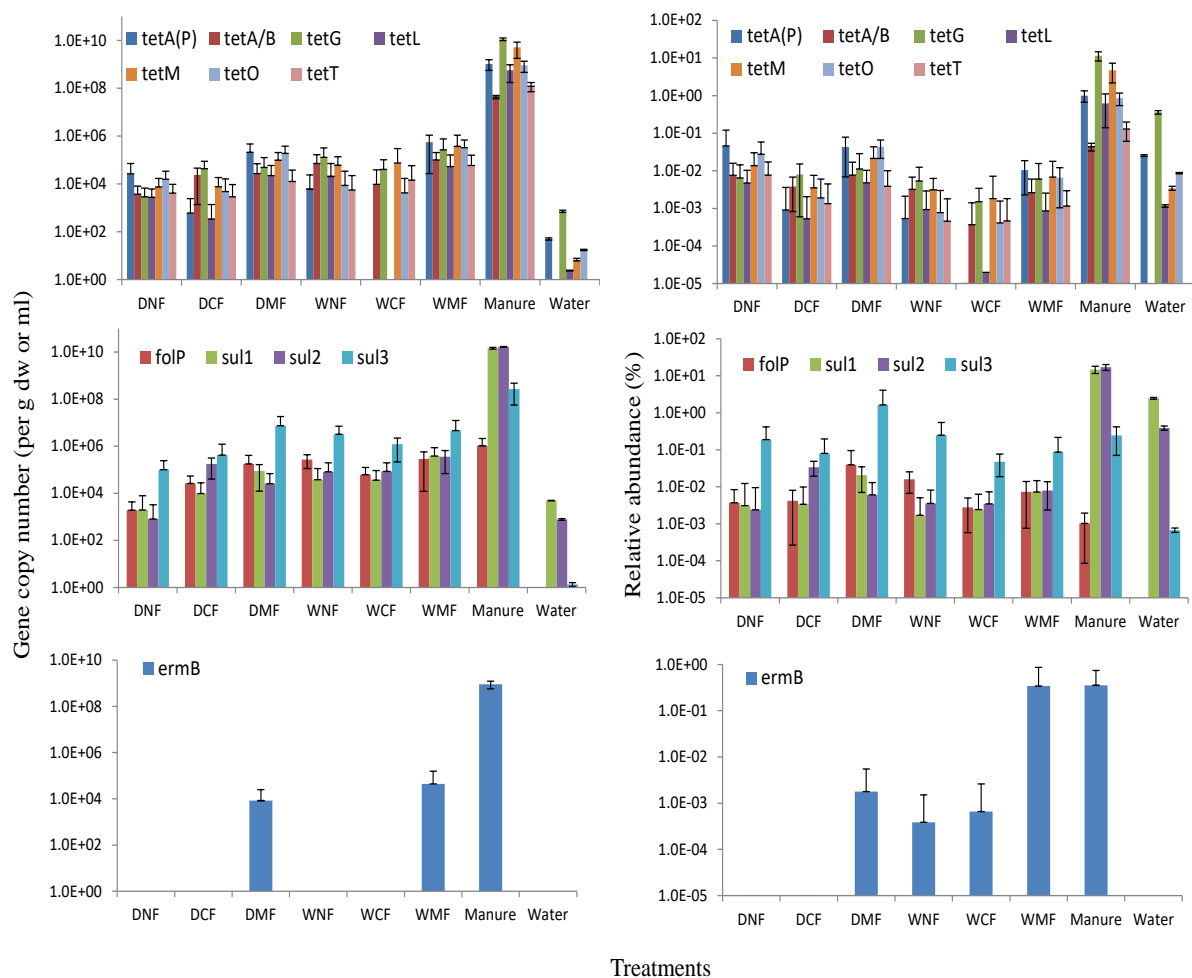

**Figure S7** Gene copy numbers and relative abundance of some special antibiotic resistance genes in soil, composted manure and irrigation water. DNF, dryland soil with no fertilizer; DCF, dryland soil with chemical fertilizer; DMF, dryland soil with composted manure; WNF, paddy soil with no fertilizer; WCF, paddy soil with chemical fertilizer; WMF, paddy soil with composted manure.

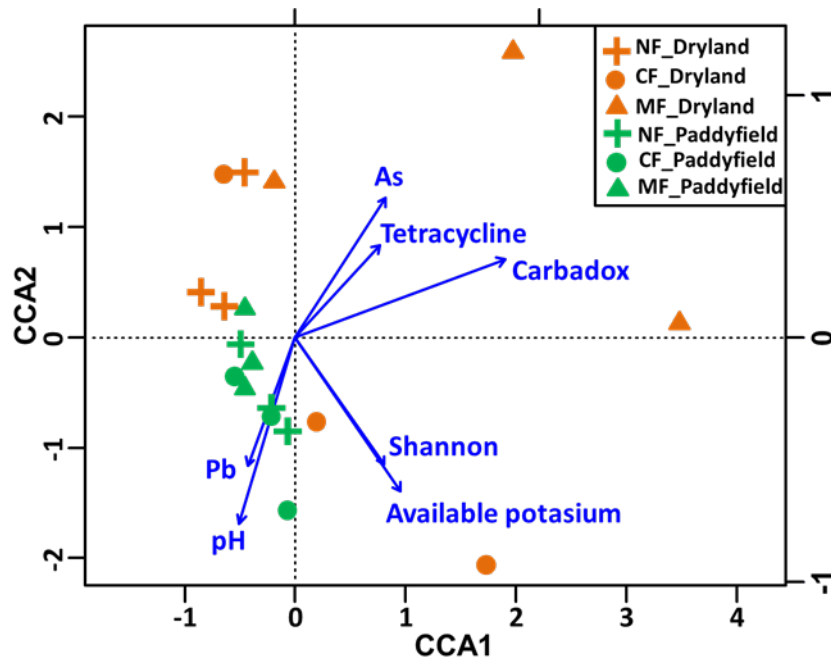

**Figure S8** Canonical correspondence analysis (CCA) of soil characters and relative abundance of antibiotic resistance genes and mobile genetic element in the dryland soil and paddy soil with application of chemical fertilizer (CF) or composted manure (MF) and without fertilizer (NF). Symbols are for soils.

107 **Table S1** Physicochemical properties of composted manure (CM) and soil in different treatment

| Sample | Moist<br>ure<br>(%) | pH    | CEC<br>cmol<br>kg <sup>-1</sup> | Pb<br>mg kg <sup>-1</sup> | Zn<br>mg kg <sup>-1</sup> | Cu<br>mg kg <sup>-1</sup> | Cd<br>mg<br>kg <sup>-1</sup> | Cr<br>mg kg <sup>-1</sup> | Hg<br>μg kg <sup>-1</sup> | As<br>mg<br>kg <sup>-1</sup> | OM<br>g kg <sup>-1</sup> | TN<br>g kg <sup>-1</sup> | TP<br>g kg <sup>-1</sup> | TK<br>g kg <sup>-1</sup> | AN<br>mg kg <sup>-1</sup> | AP<br>mg kg <sup>-1</sup> | AK<br>mg kg <sup>-1</sup> |
|--------|---------------------|-------|---------------------------------|---------------------------|---------------------------|---------------------------|------------------------------|---------------------------|---------------------------|------------------------------|--------------------------|--------------------------|--------------------------|--------------------------|---------------------------|---------------------------|---------------------------|
| DNF    | 11.95               | 4.80c | 14.11b                          | 30.10ab                   | 78.27c                    | 28.90c                    | 0.25b                        | 52.05c                    | 63.45a                    | 15.40a                       | 10.71e                   | 0.73e                    | 0.55f                    | 9.25c                    | 85.75b                    | 15.23f                    | 141.67b                   |
| DCF    | 9.86                | 5.24b | 14.42b                          | 32.23a                    | 84.48c                    | 29.16c                    | 0.21b                        | 63.18b                    | 59.95a                    | 16.89a                       | 10.44e                   | 0.71e                    | 0.53f                    | 15.23a                   | 83.30b                    | 45.34d                    | 186.67a                   |
| DMF    | 11.33               | 4.84c | 14.42b                          | 28.43b                    | 89.86b                    | 33.66b                    | 0.28b                        | 64.86b                    | 64.52a                    | 15.62a                       | 12.53d                   | 0.87d                    | 0.99d                    | 10.1b                    | 84.53b                    | 38.26e                    | 162.50a                   |
| WNF    | 46.94               | 5.55b | 18.87a                          | 36.48a                    | 79.21c                    | 25.26d                    | 0.24b                        | 43.87d                    | 31.12c                    | 7.66b                        | 17.57c                   | 1.10c                    | 0.81e                    | 17.35a                   | 94.33b                    | 72.95c                    | 146.67b                   |
| WCF    | 53.99               | 5.63b | 19.11a                          | 32.52a                    | 83.16c                    | 27.27cd                   | 0.25b                        | 64.38b                    | 34.30bc                   | 8.14b                        | 19.67b                   | 1.48b                    | 1.17c                    | 15.93a                   | 123.73a                   | 119.47b                   | 181.25a                   |
| WMF    | 60.00               | 5.57b | 17.10a                          | 31.57a                    | 105.31a                   | 41.23a                    | 0.58a                        | 72.78a                    | 39.21b                    | 8.22b                        | 21.50a                   | 1.43b                    | 1.45b                    | 15.85a                   | 129.85a                   | 183.28a                   | 176.25a                   |
| CM     |                     | 7.43a |                                 |                           |                           |                           |                              |                           |                           |                              |                          | 20.97a                   | 22.47a                   | 9.55c                    |                           |                           |                           |

108

109 Note: DNF, dryland soil with no fertilizer; DCF, dryland soil with chemical fertilizer; DMF, dryland soil with composted manure; WNF, paddy

110 field soil with no fertilizer; WCF, paddy field soil with chemical fertilizer; WMF, paddy field soil with composted manure.

111

**Table S2** Mantel test on the relationship (r) between the relative abundance of the antibiotic resistance genes (ARGs) and mobile genetic elements (MGEs) and main soil factors influencing the distribution of ARGs in soil<sup>a</sup>.

|                     | Pearson |         | Spearman |         |
|---------------------|---------|---------|----------|---------|
|                     | r       | p       | r        | p       |
| pH                  | 0.17    | 0.02*   | 0.22     | 0.01*   |
| Pb                  | 0.06    | 0.32    | 0.04     | 0.40    |
| As                  | 0.15    | 0.02*   | 0.17     | 0.02*   |
| Available potassium | 0.24    | 0.14    | 0.18     | 0.14    |
| Carbadox            | 0.60    | 0.007** | 0.45     | 0.03*   |
| Tetracycline        | 0.11    | 0.20    | 0.15     | 0.16    |
| Shannon index       | 0.64    | 0.001** | 0.55     | 0.001** |

<sup>a</sup>: Significance level: p<0.05(\*), p<0.01(\*\*)
